# Supplementary material
Source: publisher site journal article supplement (https://www.dovepress.com/article/286087)
Supplement: Supplementary file 1 [file get_supplementary_file.php]

**Supplementary information**

***Lung function***

Over 24 weeks, the magnitude of improvement (mL [95% CI], unadjusted *p*-value) in FEV1 AUC0–4 was greater with BGF MDI than BFF MDI and BUD/FORM DPI, both in those not reporting (122 [90, 153]; *p*<0.0001 and 77 [45, 110]; *p*<0.0001, respectively) and in those reporting (55 [6, 104]; *p*=0.0269 and 125 [78, 172]; *p*<0.0001, respectively) a prior exacerbation (Table S4B, Table S4C; Figure S3A). A small magnitude benefit in FEV1 AUC0–4 was seen for BGF MDI versus GFF MDI in those reporting and not reporting a prior exacerbation (35 [–5, 75]; *p*=0.0882 and 11 [–14, 37]; *p*=0.3847, respectively) (Table S4B, Table S4C).

The change from baseline in morning pre-dose trough FEV1 (mL [95% CI]) over 24 weeks was also greater with by BGF MDI versus BFF MDI and BUD/FORM DPI in the no prior exacerbation subgroup (88 [63, 113]; *p*<0.0001 and 46 [21, 71]; *p*=0.0003, respectively), and versus BUD/FORM DPI, but not BFF MDI in the prior exacerbation subgroup (96 [56, 137]; *p*<0.0001 and 29 [–12, 71]; *p*=0.1645, respectively) (Table S4B, Table S4C; Figure S3B). Small improvements in favor of BGF MDI in change from baseline in morning pre-dose trough FEV1 versus GFF MDI were observed in those reporting and not reporting a prior exacerbation (28 [–6, 62]; *p*=0.1035 and 20 [–1, 40]; *p*=0.0559, respectively) (Table S4B, Table S4C).

Improvements for BGF MDI versus comparators were generally similar throughout the 24-week treatment period for FEV1 AUC0–4 and change from baseline in morning pre-dose trough FEV1 for both subgroups (Figure S3A, Figure S3B).

**Table S1** Exacerbation outcomes in the subgroup of patients with no history of prior exacerbations in the previous 12 months and no prior ICS use (efficacy estimand, mITT population)

|  | **BGF MDI  320/18/9.6 μg** | **GFF MDI 18/9.6 μg** | **BFF MDI  320/9.6 μg** | **BUD/FORM DPI 400/12 μg** |
| --- | --- | --- | --- | --- |
| Patients, N | N=136 | N=147 | N=73 | N=77 |
| Rate of moderate/severe COPD exacerbations | | | | |
| Number of events, n | 19 | 28 | 13 | 10 |
| Adjusted annualized rate (SE) | 0.32 (0.09) | 0.45 (0.11) | 0.41 (0.14) | 0.26 (0.10) |
| Rate ratio, BGF MDI vs comparator (95% CI) | - | 0.73 (0.36, 1.47) | 0.79 (0.33, 1.86) | 1.24 (0.49, 3.13) |
| *p*-value | - | 0.3742 | 0.5862 | 0.6481 |
| Time to first moderate/severe COPD exacerbation | | | | |
| Number of patients with exacerbations, n (%) | 18 (13.2) | 20 (13.6) | 12 (16.4) | 8 (10.4) |
| Hazard ratio, BGF MDI vs comparator (95% CI) | - | 0.980 (0.517, 1.857) | 0.808 (0.389, 1.680) | 1.394 (0.605, 3.213) |
| Cox regression  *p*-value | - | 0.9505 | 0.5682 | 0.4359 |
| Log rank *p*-value | - | 0.9772 | 0.7105 | 0.5891 |

**Notes:** Treatments are compared adjusting for baseline post-bronchodilator percent predicted FEV1 and baseline eosinophil count as continuous covariates and country and inhaled corticosteroid use at screening (yes/no) as categorical covariates using negative binomial regression.

**Abbreviations:** BFF, budesonide/formoterol fumarate; BGF, budesonide/glycopyrrolate/formoterol fumarate; BUD/FORM DPI, budesonide/formoterol fumarate dry powder inhaler; CI, confidence interval; COPD, chronic obstructive pulmonary disease; GFF, glycopyrrolate/formoterol fumarate; MDI, metered dose inhaler; mITT, modified intent-to-treat; SE, standard error.

**Table S2** Model-estimated rates of moderate/severe COPD exacerbations for patients with ICS use in the 30 days prior to screening excluding the first 30 days of data (mITT population, efficacy estimand)

|  | **BGF MDI  320/18/9.6 μg** | **GFF MDI 18/9.6 μg** | **BFF MDI  320/9.6 μg** | **BUD/FORM DPI 400/12 μg** |
| --- | --- | --- | --- | --- |
| Patients, N | N=452 | N=424 | N=214 | N=215 |
| Rate of moderate/severe COPD exacerbations | | | | |
| Number of events, n | 88 | 155 | 46 | 51 |
| Adjusted annualized rate, (SE) | 0.53 (0.07) | 1.23 (0.14) | 0.60 (0.11) | 0.65 (0.12) |
| Rate ratio, BGF MDI  vs comparator (95% CI) | - | 0.43 (0.31, 0.60) | 0.88 (0.57, 1.37) | 0.82 (0.53, 1.25) |
| *p*-value | - | <0.0001 | 0.5797 | 0.3497 |
| Time to first moderate/severe COPD exacerbation | | | | |
| Number of patients with exacerbations, n (%) | 71 (15.7) | 106 (25.0) | 42 (19.6) | 42 (19.5) |
| Hazard ratio, BGF MDI vs comparator (95% CI) | - | 0.54 (0.40, 0.73) | 0.75 (0.51, 1.10) | 0.81 (0.55, 1.19) |
| Cox regression  *p*-value | - | 0.0002 | 0.0456 | 0.0634 |

**Notes:** Treatments are compared adjusting for baseline post-bronchodilator percent predicted FEV1 and baseline eosinophil count as continuous covariates and country and inhaled corticosteroid use at screening (yes/no) as categorical covariates using negative binomial regression.

**Abbreviations:** BFF, budesonide/formoterol fumarate; BGF, budesonide/glycopyrrolate/formoterol fumarate; BUD/FORM DPI, budesonide/formoterol fumarate dry powder inhaler; CI, confidence interval; COPD, chronic obstructive pulmonary disease; FEV1; forced expiratory volume in 1 s; GFF, glycopyrrolate/formoterol fumarate; MDI, metered dose inhaler; mITT, modified intent-to-treat; SE, standard error.

**Table S3** Model-estimated rates of moderate/severe COPD exacerbations by reported exacerbations in the previous 12 months, excluding the first 30 days of data (mITT population, efficacy estimand)

(**A**) Overall population

|  | **BGF MDI  320/18/9.6 μg** | **GFF MDI 18/9.6 μg** | **BFF MDI  320/9.6 μg** | **BUD/FORM DPI 400/12 μg** |
| --- | --- | --- | --- | --- |
| OVERALL POPULATION | | | | |
| Patients, N | N=625 | N=605 | N=303 | N=305 |
| Rate of moderate/severe COPD exacerbations | | | | |
| Number of events, n | 116 | 184 | 58 | 63 |
| Adjusted annualized rate, (SE) | 0.49 (0.06) | 0.95 (0.10) | 0.53 (0.09) | 0.55 (0.09) |
| Rate ratio, BGF MDI  vs comparator (95% CI) | - | 0.52 (0.39, 0.70) | 0.93 (0.63, 1.37) | 0.89 (0.61, 1.30) |
| *p*-value | - | <0.0001 | 0.7118 | 0.5501 |
| Time to first moderate/severe COPD exacerbation | | | | |
| Number of patients with exacerbations, n (%) | 96 (15.4) | 129 (21.3) | 53 (17.5) | 53 (17.4) |
| Hazard ratio, BGF MDI vs comparator (95% CI) | - | 0.65  (0.50, 0.85) | 0.83  (0.59, 1.16) | 0.90  (0.64, 1.26) |
| Cox regression  *p*-value | - | 0.0037 | 0.1677 | 0.2237 |

(**B**) No prior exacerbations

|  | **BGF MDI  320/18/9.6 μg** | **GFF MDI 18/9.6 μg** | **BFF MDI  320/9.6 μg** | **BUD/FORM DPI 400/12 μg** |
| --- | --- | --- | --- | --- |
| Patients, N | N=460 | N=457 | N=228 | N=225 |
| Rate of moderate/severe COPD exacerbations | | | | |
| Number of events, n | 77 | 120 | 33 | 39 |
| Adjusted annualized rate, (SE) | 0.46 (0.06) | 0.81 (0.10) | 0.40 (0.08) | 0.47 (0.09) |
| Rate ratio, BGF MDI vs comparator  (95% CI) | - | 0.57 (0.40, 0.81) | 1.14 (0.71, 1.86) | 0.97 (0.61, 1.55) |
| *p*-value | - | 0.0017 | 0.5858 | 0.9075 |
| Time to first moderate/severe COPD exacerbation | | | | |
| Number of patients with exacerbations, n (%) | 66 (14.3) | 89 (19.5) | 31 (13.6) | 33 (14.7) |
| Hazard ratio, BGF MDI vs comparator (95% CI) | - | 0.70 (0.51, 0.96) | 1.05 (0.68, 1.61) | 0.97  (0.64, 1.48) |
| Cox regression  *p*-value | - | 0.0344 | 0.8492 | 0.7140 |

(**C**) Prior exacerbations

|  | **BGF MDI  320/18/9.6 μg** | **GFF MDI 18/9.6 μg** | **BFF MDI  320/9.6 μg** | **BUD/FORM DPI 400/12 μg** |
| --- | --- | --- | --- | --- |
| Patients, N | N=165 | N=148 | N=75 | N=80 |
| Rate of moderate/severe COPD exacerbations | | | | |
| Number of events, n | 39 | 64 | 25 | 24 |
| Adjusted annualized rate, (SE) | 0.63 (0.13) | 1.47 (0.26) | 0.98 (0.26) | 0.85 (0.23) |
| Rate ratio, BGF MDI vs comparator (95% CI) | - | 0.43 (0.25, 0.72) | 0.65 (0.34, 1.23) | 0.74 (0.39, 1.42) |
| *p*-value | - | 0.0015 | 0.1847 | 0.3681 |
| Time to first moderate/severe COPD exacerbation | | | | |
| Number of patients with exacerbations, n (%) | 30 (18.2) | 40 (27.0) | 22 (29.3) | 20 (25.0) |
| Hazard ratio, BGF MDI vs comparator (95% CI) | - | 0.55  (0.34, 0.89) | 0.54  (0.31, 0.94) | 0.78 (0.44, 1.39) |
| Cox regression  *p*-value | - | 0.0201 | 0.0193 | 0.0887 |

**Notes:** Treatments are compared adjusting for baseline post-bronchodilator percent predicted FEV1 and baseline eosinophil count as continuous covariates and country and inhaled corticosteroid use at screening (yes/no) as categorical covariates using negative binomial regression.

**Abbreviations:** BFF, budesonide/formoterol fumarate; BGF, budesonide/glycopyrrolate/formoterol fumarate; BUD/FORM DPI, budesonide/formoterol fumarate dry powder inhaler; CI, confidence interval; COPD, chronic obstructive pulmonary disease; GFF, glycopyrrolate/formoterol fumarate; MDI, metered dose inhaler; mITT, modified intent-to-treat; SE, standard error.

**Table S4** Lung function over 24 weeks by reported exacerbations (efficacy estimand, mITT population)

(**A**) Overall population

|  | **BGF MDI  320/18/9.6 μg** | **GFF MDI 18/9.6 μg** | **BFF MDI  320/9.6 μg** | **BUD/FORM DPI 400/12 μg** |
| --- | --- | --- | --- | --- |
| FEV1 AUC0–4, mL | | | | |
| Number of patients, n | 501 | 485 | 245 | 248 |
| LSM (SE) | 305 (8.4) | 288 (8.5) | 201 (11.7) | 214 (11.5) |
| BGF MDI  vs comparator, LSM (95% CI) | - | 16 (−6, 38) | 104 (77, 131) | 91 (64, 117) |
| *p*-value | - | 0.1448 | <0.0001 | <0.0001 |
| Change from baseline over 24 weeks in morning pre-dose trough FEV1, mL | | | | |
| Number of  patients, n | 622 | 601 | 300 | 301 |
| LSM (SE) | 147 (6.5) | 125 (6.6) | 73 (9.2) | 88 (9.1) |
| BGF MDI  vs comparator, LSM (95% CI) | - | 22  (4, 39) | 74  (52, 95) | 59  (38, 80) |
| *p*-value | - | 0.0139 | <0.0001 | <0.0001 |

(**B**) No prior exacerbations

|  | **BGF MDI  320/18/9.6 μg** | **GFF MDI 18/9.6 μg** | **BFF MDI  320/9.6 μg** | **BUD/FORM DPI 400/12 μg** |
| --- | --- | --- | --- | --- |
| FEV1 AUC0–4, mL | | | | |
| Number of patients, n | 366 | 357 | 178 | 175 |
| LSM (SE) | 309 (9.9) | 297 (10.0) | 187 (13.8) | 231 (13.8) |
| BGF MDI  vs comparator, LSM (95% CI) | - | 11  (–14, 37) | 122  (90, 153) | 77  (45, 110) |
| *p*-value | - | 0.3847 | <0.0001 | <0.0001 |
| Change from baseline over 24 weeks in morning pre-dose trough FEV1, mL | | | | |
| Number of patients, n | 457 | 455 | 225 | 222 |
| LSM (SE) | 146 (7.6) | 126 (7.6) | 58 (10.6) | 100 (10.6) |
| BGF MDI  vs comparator, LSM (95% CI) | - | 20  (–1, 40) | 88  (63, 113) | 46  (21, 71) |
| *p*-value | - | 0.0559 | <0.0001 | 0.0003 |

(**C**) Prior exacerbations

|  | **BGF MDI  320/18/9.6 μg** | **GFF MDI 18/9.6 μg** | **BFF MDI  320/9.6 μg** | **BUD/FORM DPI 400/12 μg** |
| --- | --- | --- | --- | --- |
| FEV1 AUC0–4, mL | | | | |
| Number of patients, n | 135 | 128 | 67 | 73 |
| LSM (SE) | 297 (15.8) | 262 (16.1) | 242 (21.4) | 172 (20.7) |
| BGF MDI  vs comparator, LSM (95% CI) | - | 35  (–5, 75) | 55  (6, 104) | 125  (78, 172) |
| *p*-value | - | 0.0882 | 0.0269 | <0.0001 |
| Change from baseline over 24 weeks in morning pre-dose trough FEV1, mL | | | | |
| Number of  patients, n | 165 | 146 | 75 | 79 |
| LSM (SE) | 149 (12.5) | 121 (13.3) | 119 (18.2) | 52 (17.7) |
| BGF MDI  vs comparator, LSM (95% CI) | - | 28  (–6, 62) | 29  (–12, 71) | 96  (56, 137) |
| *p*-value | - | 0.1035 | 0.1645 | <0.0001 |

**Abbreviations:** AUC0–4, area under curve from 0–4 hours; BFF, budesonide/formoterol fumarate; BGF, budesonide/glycopyrrolate/formoterol fumarate; BUD/FORM DPI, budesonide/formoterol fumarate dry powder inhaler; CI, confidence interval; GFF, glycopyrrolate/formoterol fumarate; LSM, least squares mean; MDI, metered dose inhaler; mITT, modified intent-to-treat; SE, standard error.

**Figure S1** Kaplan-Meier curves for time to first moderate/severe COPD exacerbation for patients with ICS use in the 30 days prior to screening excluding the first 30 days of data (mITT population, efficacy estimand)


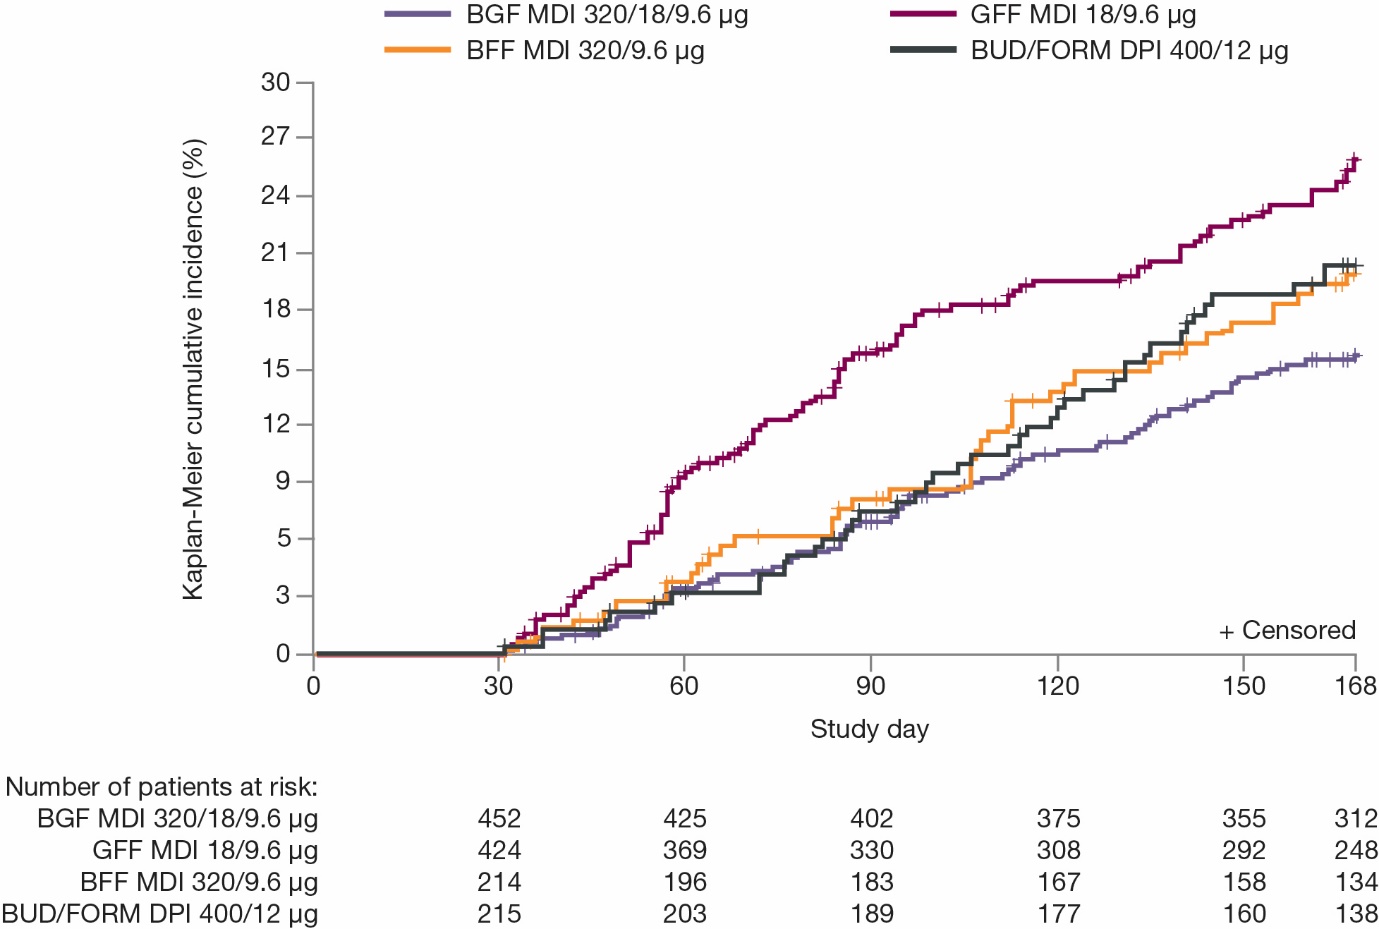


**Abbreviations:** BFF, budesonide/formoterol fumarate; BGF, budesonide/glycopyrrolate/formoterol fumarate; BUD/FORM DPI, budesonide/formoterol fumarate dry powder inhaler; COPD, chronic obstructive pulmonary disease; GFF, glycopyrrolate/formoterol fumarate; ICS, inhaled corticosteroids; MDI, metered dose inhaler; mITT, modified intent-to-treat.

**Figure S2** Kaplan-Meier curves for time to first moderate/severe COPD exacerbation for (**A**) overall population, (**B**) reported prior exacerbations, and (**C**) no reported prior exacerbations excluding the first 30 days of data (mITT population, efficacy estimand)


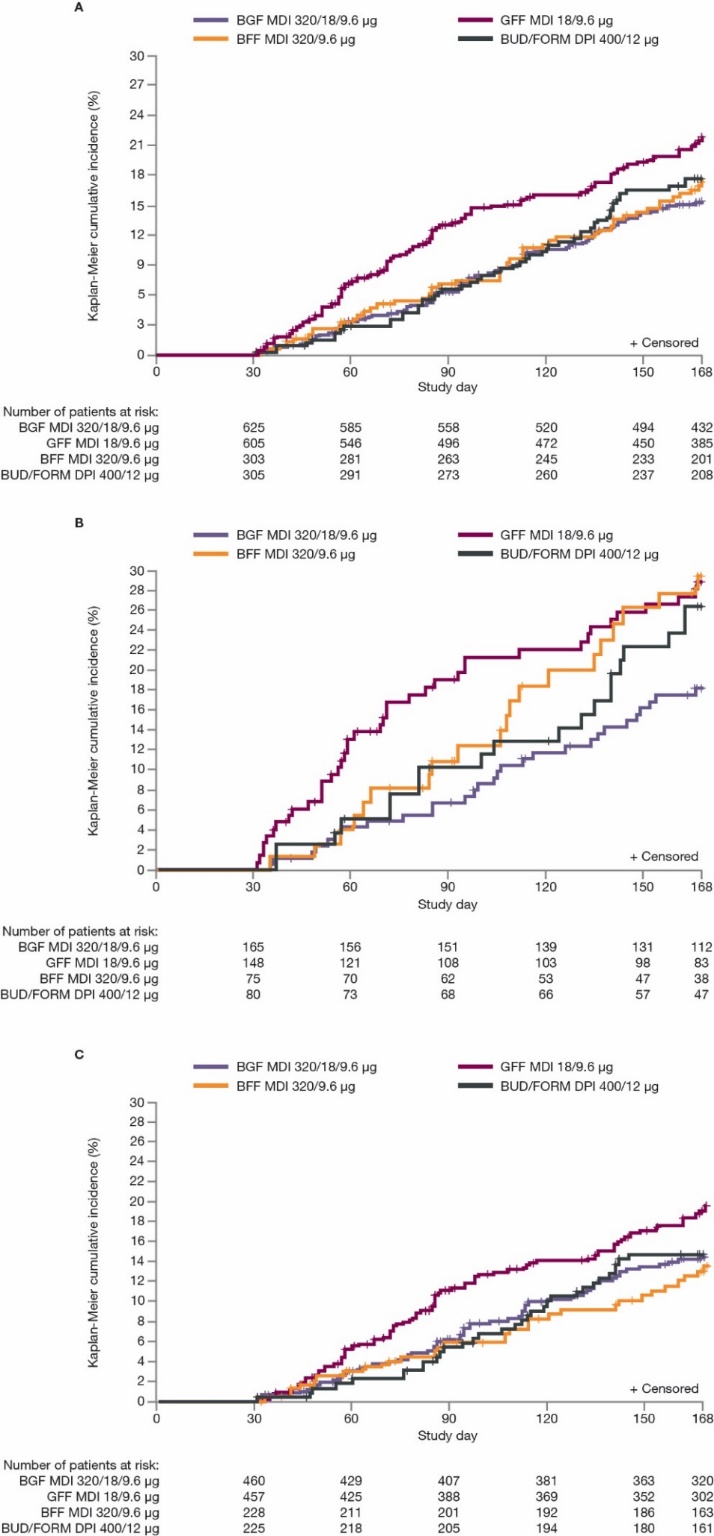


**Abbreviations:** BFF, budesonide/formoterol fumarate; BGF, budesonide/glycopyrrolate/formoterol fumarate; BUD/FORM DPI, budesonide/formoterol fumarate dry powder inhaler; COPD, chronic obstructive pulmonary disease; GFF, glycopyrrolate/formoterol fumarate; MDI, metered dose inhaler; mITT, modified intent-to-treat.

**Figure S3** Comparison of lung function endpoints over time for patients reporting and not reporting a prior exacerbation (mITT population; efficacy estimand) (**A**) FEV1 AUC0–4, and (**B**) Change from baseline in morning pre-dose FEV1


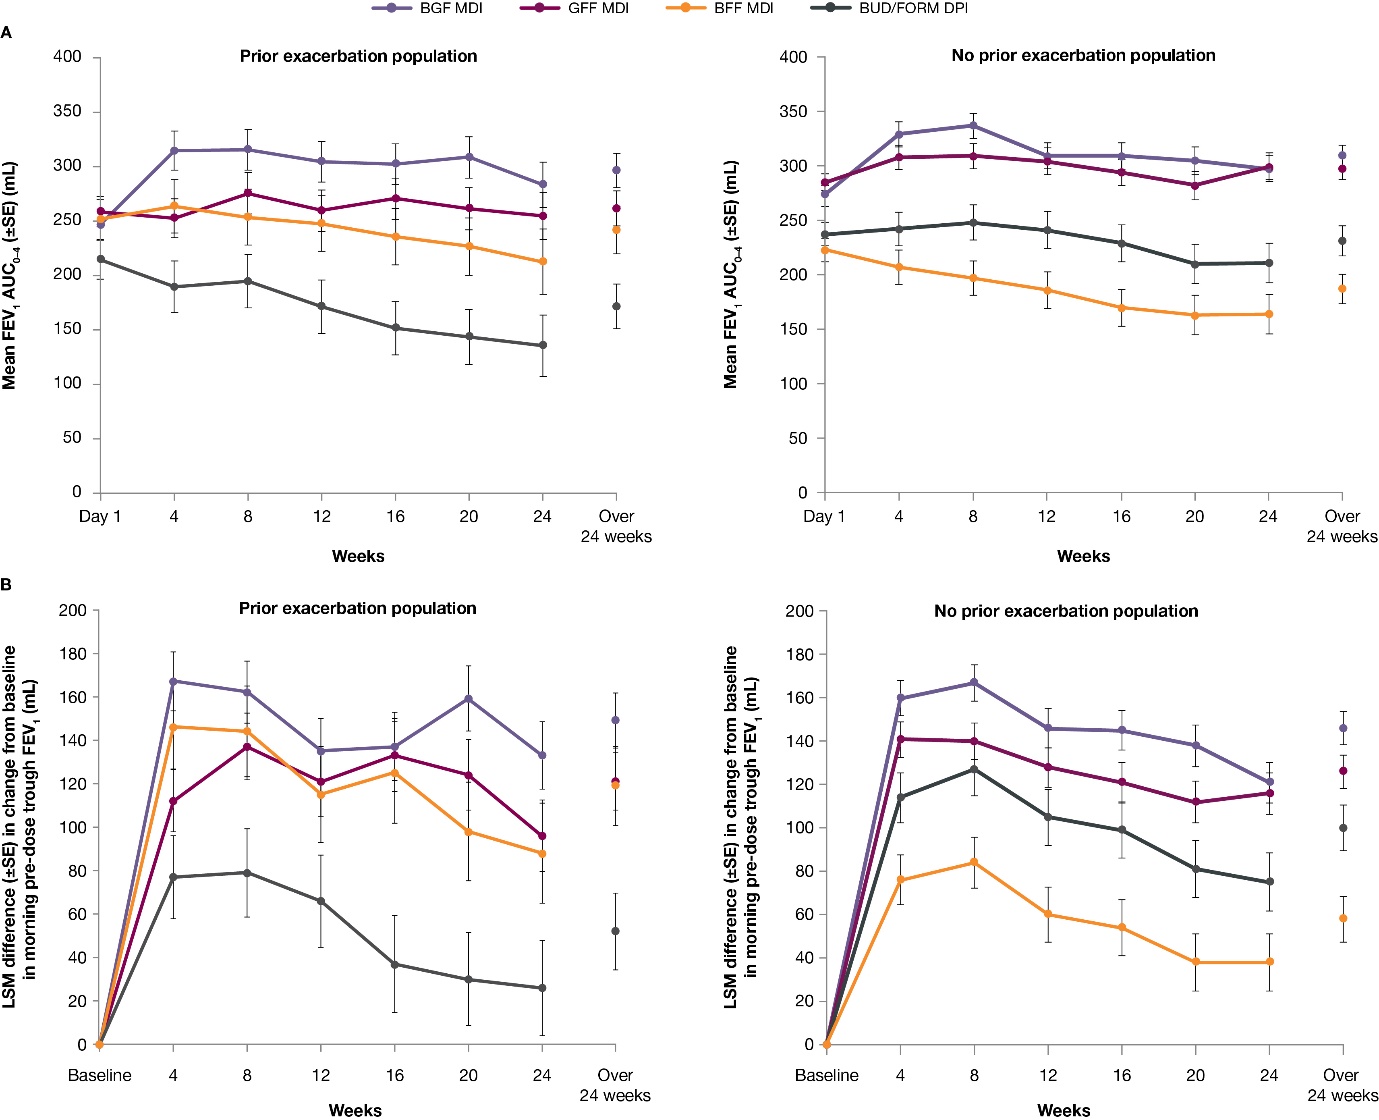


Error bars represent SE.

**Abbreviations:** AUC0–4, area under curve from 0–4 hours; BFF, budesonide/formoterol fumarate; BGF, budesonide/glycopyrrolate/formoterol fumarate; BUD/FORM DPI, budesonide/formoterol fumarate dry powder inhaler; FEV1, forced expiratory volume in 1 second; GFF, glycopyrrolate/formoterol fumarate; LSM, least squares mean; MDI, metered dose inhaler; mITT, modified intent-to-treat; SE, standard error.

**Independent Ethics Committees/Institutional Review Boards consulted**

| Independent ethics committees/institutional review boards (IRB) |
| --- |
| Schulman, 4445 Lake Forest Drive, Suite 300, Cincinnati, OH 45242, USA |
| Showa University Hospital IRB, 158 Hatanodia, Shinagawa-KU, Tokyo, Japan |
| Nihonbashi EGAWA Clinic IRB, 2F Kotobuki Bld 1-1-3 Yaesu, Chuo-ku, Tokyo, Japan |
| Aso Iizuka Hospital IRB, 3-83, Yoshio-machi Iizuka-shi, Fukouka, Japan |
| Medical Corporation IHL, Shinagawa East One Medical Clinic IRB, 2-16-1 Shinagawa East One Tower 3F, Konan, Minato-ku, Tokyo, Japan |
| Review Board of Human Rights and Ethics for Clinical Studies IRB, 13-2 Ichiban-cho, Chiyoda‑ku, Tokyo, Japan |
| Social Medical Corporation Keiaikai Nakagami Hospital IRB, 6-2-25 Chibana, Okinawa-Shi, Okinawa, Japan |
| Harasanshin General Hospital IRB, 1-8 Taihakumachi Hakata-ku, Fukouoka-shi, Japan |
| Medical Corporate Corporation Mitsuyakai, Maebashi Hirosegawa Clinic IRB, 2-10-9 Chiyoda‑machi, Maebashi-shi, Gunma, Japan |
| Toyama University Hospital IRB, 2630 Sugiya Toyama-shi, Japan |
| Local Independent Administrative Agencies Naha City Hospital IRB, 2-31-1 Furujima, Naha-shi, Okinawa, Japan |
| Yaesu Sakura-dori Clinic IRB, Yaesu Center Bldg. 3F, 1-6-6 Yaesu Chuo-ku, Tokyo, Japan |
| Medical Corporation Association Shintokai, Yokohama Minoru Clinic IRB, 1-13-8 Bessho Minami-ku, Yokohama-shi, Kanagawa, Japan |
| Medical Corporation Seiwakai Nagata Hospital IRB, 523-1 Shimomiyanaga-machi, Yanagawa-shi, Fukuoka, Japan |
| Aida Hospital IRB, 216 Motomachi, Yabuki-machi, Nishishirakawa-gun, Fukushima, Japan |
| Okitama Public General Hospital IRB, 2000 Nishiotsuka, Kawanishi-machi, Higashiokitama-gun, Yamagata, Japan |
| Sakaide City Hospital IRB, 3-1-2 Kotobuki-cho, Sakaide-shi, Japan |
| IRB of International Health and Welfare Group of Kyushu District. 3-6-45 Momochihama, Sawara‑ku, Fukuoka-shi, Japan |
| Saiseikai Toyama Hospital IRB, 33-1 Kusunoki, Toyama-shi, Toyama, Japan |
| Fukuoka University Hospital IRB, 7-45-1 Nanakuma, Jonan-ku, Fukuoka-shi, Japan |
| Kyorin University Hospital IRB, 6-20-2 Shinkawa Mitaka-shi, Tokyo, Japan |
| Tosei General Hospital IRB, 160 Nishioiwake-cho, Seto-shi, Aichi, Japan |
| IRB of Kinki University Hospital, 377-2 Onohigashi, Osakasayama-shi, Osaka, Japan |
| Itabashi Hospital Nihon University School of Medicine IRB, 30-1 Oyaguchi Kamicho, Itabashi-ku, Tokyo, Japan |
| Matasusaka City Hospital IRB, 1550 Tonomachi, Matsusaka-shi, Mie, Japan |
| Hamamatsu Clinical Research Network IRB, 2-12-12, Sumiyoshi Naka-ku Hamamatsu-shi Shizuoka, Japan |
| National Hospital Organization Disaster Medical Center IRB, 3256 Midoricho, Tachikawa-shi, Tokyo, Japan |
| Iwata City Hospital IRB 512-3, Okubo Iwata-shi, Shizuoka, Japan |
| National Hospital Organization Kinki-Chuo Chest Medical Center IRB, 1180 Nagasonecho, Kita-ku, Sakai-shi, Osaka, Japan |
| Tohoku University Hospital IRB, 1-1 Seiryomachi, Aoba-ku, Sendai-shi, Miyagi, Japan |
| IRB of Juntendo University Hospital, 3-1-3 Hongo, Bunkyo-ku, Tokyo, Japan |
| Medical Corporate Corporation Mitsuyakai, Maebashi Hirosegawa Clinic IRB, 2-10-9 Chiyoda-machi, Maebashi-shi, Gunam, Japan |
| Shizuoka City Shizuoka Hospital IRB, 10-93 Ote-machi, Aoi-ku, Shizouka-shi Shizuoka Japan |
| Kokkakomuinkyosaikumiairengokai Kure Kyosai Hospital IRB, 2-3-28, Nishichuo, Kure-shi, Hiroshima, Japan |
| Chugoku Rosai Hospital IRB, 1-5-1 Hirotagaya, Kure-shi, Hiroshima, Japan |
| National Hospital Organization Okinawa National Hospital IRB, 3-20-14, Ganeko, Ginowan-shi, Okinawa, Japan |
| Japanese Red Cross Kyoto Daini Hospital IRB, 355-5 Haruobicho, Kamanzadori‑Marutamchi‑agaru, Kamigyo-ku, Kyoto, Japan |
| IRB of Ogaki Municipal Hospital, 4-86 Minaminokawa-cho, Ogaki-shi, Gifu, Japan |
| Rakuwakai Otowa Hospital IRB, 2 Otowachinji-cho, Yamashina-ku, Kyoto-shi Kyoto, Japan |
| NTT East Tohoku Hospital IRB, 2-29-1, Yamatomachi, Wakabayashi-ku, Sendai-shi, Miyagi, Japan |
| Medical Coproration Fujinokikai, Hoshikuma, Dermatology Allergy Clinic IRB, 2-1-1 Noke Sawara-ku Fukuoka-shi, Fukuoka, Japan |
| National Hospital Organization Tenryu Hospital IRB, 4201-2 Oro, Hamakita-ku Hamamatsu, Shizuoka, Japan |
| Kanazawa Medical University Hospital IRB, 1-1 Daigaku, Kahoku-gun uchinadamachi, Ishikawa, Japan |
| Kasaoka City Hospital IRB, 5628-1 Kasaoka, Kasaoka-shi, Okayama, Japan |
| Shimane Prefectural Central Hospital, IRB, 4-1-1 Himehara Izumo-shi, Shimane, Japan |
| Saiseikai Suita Hospital IRB, 1-2 Kawazonocho, Suita-shi, Osaka, Japan |
| St. Luke’s International Hospital IRB, 9-1 Akashi-cho, Chuo-ku, Tokyo, Japan |
| Toho University Ohashi Medical Center, 2-17-6 Ohashi, Meguro-ku, Tokyo, Japan |
| Sekino Hospital IRB, 3-28-3 Ikebukuro, Toshima-ku, Tokyo, Japan |
| Nagoya University Hospital IRB, 65 Tsurumaicho, Show-ku, Nagoysa-shi, Aichi, Japan |
| Medical Corporation TOUKEIKAI Kitamachi Clinic IRB, 1-1-3 Kichijoji Kitamachi, Musashino‑shi, Tokyo, Japan |
| Toyama Medical Association IRB, 336 Ninagawa, Toyama-shi, Toyama, Japan |
| Takeda Hospital Group IRB, 28-1 Ishidamoriminami-cho, Fushimi-ku, Kyoto-shi, Kyoto, Japan |
| Center Hospital of the National Center for Global Health and Medicine IRB, 1-21-1 Toyama, Shinjuku-ku, Tokyo, Japan |
| National Hospital Organization Tokyo National Hospital IRB, 3-1-1 Takeoka, Kiyose-shi, Tokyo, Japan |
| Osaka Police Hospital IRB, 10-31 Kitayama-cho, Tennouji-ku, Osaka-shi, Osaka, Japan |
| Kansai Medical University Hospital IRB, 2-3-1 Shinamchi, Kirakata-shi, Osaka, Japan |
| Shimane University Hospital IRB, 89-1 Enya-cho Izumo-shi, Shimane, Japan |
| Yokohama City University Hospital IRB, 3-9 Fukuura, Kanazawa-ku, Yokohama-shi, Japan |
| Nagoya Ekisaikai Hospital IRB, 4-66 Shonen-cho, Nakagawa-ku, Nagoya-shi, Aichi, Japan |
| Fujita General Hospital IRB, 14 Sanbongi, Tsukanome, Kunimi-machi, Date-gun, Fukushima, Japan |
| Yasuda Clinic IRB, 53 Kuzeoyabucho, Minami-ku, Kyoto-shi, Kyoto, Japan |
| Daido Hospital IRB, 9 Hakusui-cho, Minami-ku, Nagoya-city, Aichi, Japan |
| Makita Hospital IRB, 2-6-25, Shinkotoniljo, Kita-ku, Sapporo-City, Hokkaido, Japan |
| Kishiwada City Hospital IRB, 1001 Gakuhara-cho, Kishiwada-shi, Osaka, Japan |
| Takahashi Internal Medicine and Respiratory Clinic IRB, 14 Nishi 3-jo Minami 4 chome, Obihiro‑shi, Hokkaido, Japan |
| Nakatani Hospital IRB 2501 Hosoe, Shikama-ku, Himeji-shi, Hyogo, Japan |
| Medical Corporation, Ouryokukai Association Nihonbashi Sakura Clinic IRB, Inamura Bldg. 5F, 1‑9-2 Nihonbashi-Kayabacho, Chuo-Ku, Tokyo, Japan |
| Sendai Open Hospital IRB, 5-22-1 Tsurugaya, Miyagino-ku, Sendai, Miyagi, Japan |
| Nagaoka Red Cross Hospital IRB, 2-297-1, Sensyu, Nagaoka-shi, Niigata, Japan |
| Takamatsu Municipal Hospital IRB, 2-36-1 Miyawakicho, Takamatsu-shi, Kagawa, Japan |
| National Hospital Organization Ehime Medical Center IRB, 366 Yokogawara, Toon-shi, Ehime, Japan |
| National Hospital Organization Fukuoka Higashi Medical Center IRB, 1-1-1 Chidori, Koga-shi, Fukuoka, Japan |
| Ethics Committee of the Chinese PLA General Hospital, No. 28 Fuxing Road, Haidian District, Beijing, China |
| China-Japan Friendship Hospital Ethics Committee, No. 2 East Yinghua Road, Chaoyang District, Beijing 100029, China |
| Medical Ethics Committee of Guangdong General Hospital, No. 106 Zhongshan Second Road, Guangzhou, Guangdong Province, China |
| Ethics Committee of Hainan General Hospital, 3F, Information Building, Hainan General Hospital, No. 19 Xiuhua Road, Xiuying District, Haikou, Hainan, China |
| Inner Mongolia People’s Hospital Clinical Trial Ethics Committee, No. 20 Zhaowuda Road, Hohhot, Inner Mongolia, 010017, China |
| Shanghai East Hospital, Tongji University Clinical Trial Ethics Committee, No. 1800 Yuntai Road, Pudong District, Shanghai, 200123, China |
| Medical Ethics Committee of Shanghai Pulmonary Hospital, No. 507 Minzheng Road, Yangpu Distr. City, Shanghai, China |
| Ethics Committee of The Affiliated Hospital of Inner Mongolia Medical University, No. 1, Tongadao North Street, Huimin District, Hohhot City, Inner Mongolia, China |
| The First Hospital of Jilin University Ethics Committee, No. 71 Xinmin Main Street, Changchun, Jilin Province, China |
| Ethics Committee of First Hospital of Shanxi Medical University, No. 85 Jiefang South Road, Taiyuan, Shanxi, 030001, China |
| Medical Ethics Committee of the General Hospital of Shenyang Military Command, No. 83 Wenhua Road, Shenhe District, Shenyang, 110016, China |
| Medical Ethics Committee of the Second Xiangya Hospital of Central South University, No. 139 Middle Ranmin Road, Changsha, Hunan, China |
| Drug Ethics Committee of Tianjin Medical University General Hospital, No. 154 An Shan Ave, Heping District, Tianjin, 300052, China |
| Ethics Committee of Beijing Hospital, No. 1 Dongdan Dahua Road, Dongcheng District, Beijing 100730, China |
| Medical Ethics Committee of Jiangxi Provincial Peoples Hospital, No. 152 Aiguo Road, Nanchang City, 330006, China |
| Medical Ethics Committee of Shengjing Hospital of China Medical University, No. 36 Sanhao Street, Heping District, Shenyang, 110004, China |
| Ethics Committee of the First Affiliated Hospital of Nanchang University, No. 17 Yongwai Main Street, Donghu District, Nanchang, Jiangxi Province, China |
| Clinical Trial Ethics Committee of Huazhong University of Science and Technology, No. 13 Hangkong Road, Wuhan City, 430030, China |
| Ethics Committee of Xinhua Hospital Shanghai Jiao Tong University School of Medicine, No. 1665 Kongjiang Road, Yangpu District, Shanghai, China |
| Medical Ethics Committee of Zhejiang Provincial People’s Hospital, No. 158 Shangtang Road, Hanghzou City, Zhejiang Province, China |
| Ethics Committee of Beijing Tongren Hospital, Capital Medical University, No. 1 Dongjiaomin Alley, Dongcheng District, Beijing City, China |
| Drug Clinical Trial Ethics Committee of the Third Affiliated Hospital of Guangzhou Medical University, 3/F Administrative Building, No. 63 Duobao Road, Guangzhou City, China |
| Medical Ethics Committee of Sun Yat-sen Memorial Hospital, Sun Yat-sen University, No. 107 Yanjiang West Road, Guangzhou City, Guangdong Province, China |
| Ethics Committee of the Second Affiliated Hospital of Wenzhou Medical University, No. 109 West Xueyuan Road, Wenzhou, Zhejiang, China |
| Drug Clinical Trial Ethics Committee of Chinese Academy of Medical Sciences, Peking Union Medical College Hospital, No. 41 Damucang Hutong, Xicheng District, Beijing, China |
| Ethics Committee of the Wuxi Hospital of Integrated Chinese Traditional and Western Medicine, No. 585 North Xingyuan Road, Wuxi, Jiangsu, China |
| Medical Ethics Committee of the First Affiliated Hospital of Guangzhou Medical University, 151 Yan Jiang Xi Road, Guangzhou (Canton) 510120, China |
| Guangzhou First Peoples Hospital Ethics Committee, No. 1 Panfu Road, Guangzhou, Guangdong Province, 510180, China |
| Clinical Trial Ethics Committee of the Affiliated Hospital of Xuzhou Medical College, No. 99 Huaihai West Road, Xuzhou City, 221000, China |
| Medical Ethics Committee of the Affiliated Hospital of Baotou Medical College, Inner Mongolia Science and Technology, Lin Yin Road, Kun Du District, Baotou, Inner Mongolia, China |
| Ethics Committee of the First Affiliated Hospital of Xinjiang Medical University, Liyushan South Road 137, Unrumqi 830054, China |
| Ethics Committee of Yangzhou No. 1 People’s Hospital, No. 368 Hanjiang Road, Yangzhou, China |
| Medical Ethics Committee of the Fifth Affiliated Hospital of Sun Yat-Sen University, No. 52 Meihua East Road, Xiangzhou District, Zhuhai, China |
| Ethics Committee of Pingzinag People’s Hospital, No. 8 Wugongshanzhongshan Road, Pingxiang City, China |
| Drug Clinical Trial Ethics Committee of Navy General Hospital, Beijing, China |
| Professional Council for Clinical Medicine Research, Medical Ethics Committee of the First Hospital of China Medical University, No. 155 Nanjing North Street, Heping District, Shenyang City, Liaoning Province, China |
| Medical Ethics Committee of Jinan Central Hospital, No. 105 Jiefang Road, Jinan 250013, China |
| Drug Clinical Trial Ethics Committee of Taizhou Hospital of Zhejiang Province, No. 150 Ximen Street, Linhai City, Zhejiang Province, China |
| Drug Clinical Trial of Ethics Committee of the Third Hospital of Changsha, No. 176 Laodong West Road, Tianxin District, Changsha City 410015, China |
| Medical Ethics Committee of the First People’s Hospital of Lianyungang, No. 182 Tongguan North Road, Lianyungang City, 222002, China |
| Anqing Municipal Hospital Drug Clinical Trial Ethics Committee, Liu Hefu, China |
| Ethics Committee of Yiyang Central Hospital, No. 118 North Kangfu Road, Yiyang, Hunan Province, 221000, China |
